# Supplementary material for: Association of Preoperative Prognostic Nutritional Index and Postoperative Acute Kidney Injury in Patients with Colorectal Cancer Surgery
Source: Nutrients. 2021 May 11;13(5):1604. doi: 10.3390/nu13051604 (PMC8170895; doi:10.3390/nu13051604)
Supplement: Supplementary file 1 [file nutrients-13-01604-s001.zip › supple.table 1.pdf]

**Supplementary table 1.** Characteristics of patients excluded from the study

|                                                    | Final patients<br>(N=3,543) | Excluded patients<br>(N=193) | Total<br>(N=3736) | P       |
|----------------------------------------------------|-----------------------------|------------------------------|-------------------|---------|
| Age; year                                          | 59.8 ± 11.2                 | 58.9 ± 8.5                   | 59.7 ± 11.0       | 0.196   |
| Sex; male                                          | 2176 (61.4%)                | 115 (59.6%)                  | 2291 (61.3%)      | 0.665   |
| Height                                             | 1.6 ± 0.1                   | 1.6 ± 0.1                    | 1.6 ± 0.1         | 0.994   |
| Weight                                             | 62.9 ± 10.5                 | 60.5 ± 11.0                  | 62.7 ± 10.5       | 0.002   |
| BMI                                                | 23.8 ± 3.1                  | 23.0 ± 3.5                   | 23.8 ± 3.1        | 0.001   |
| DM                                                 | 523 (14.8%)                 | 21 (10.9%)                   | 544 (14.6%)       | 0.166   |
| HTN                                                | 1174 (33.1%)                | 58 (30.1%)                   | 1232 (33.0%)      | 0.419   |
| CVA                                                | 71 (2.0%)                   | 1 (0.5%)                     | 72 (1.9%)         | 0.182   |
| ASA status                                         |                             |                              |                   | 0.651   |
| ASA 1                                              | 840 (23.7%)                 | 40 (20.7%)                   | 880 (23.6%)       |         |
| ASA 2                                              | 2628 (74.2%)                | 149 (77.2%)                  | 2777 (74.3%)      |         |
| ASA 3                                              | 75 (2.1%)                   | 4 (2.1%)                     | 79 (2.1%)         |         |
| Laparoscopic surgery                               | 974 (27.5%)                 | 49 (25.4%)                   | 1023 (27.3%)      | 0.579   |
| Colloid use                                        | 2551 (72.0%)                | 151 (78.2%)                  | 2702 (72.3%)      | 0.071   |
| Diuretics                                          | 18 (0.5%)                   | 5 (2.6%)                     | 23 (0.6%)         | 0.005   |
| RBC transfusion                                    | 0.1 ± 0.4                   | 0.3 ± 1.2                    | 0.1 ± 0.5         | 0.021   |
| Urine output; mL kg <sup>-1</sup> hr <sup>-1</sup> | 1.9 ± 1.6                   | 1.8 ± 1.6                    | 1.9 ± 1.6         | 0.345   |
| Lowest MBP; mmHg                                   | 71.0 ± 8.9                  | 70.0 ± 9.4                   | 71.0 ± 8.9        | 0.106   |
| Operation time; min                                | 171.1 ± 61.0                | 199.7 ± 93.5                 | 172.5 ± 63.3      | < 0.001 |
| ICU admission                                      | 92 (2.6%)                   | 6 (3.1%)                     | 98 (2.6%)         | 0.840   |
| Hospital days                                      | 8.1 ± 6.5                   | 10.5 ± 7.8                   | 8.4 ± 7.3         | < 0.001 |
| Overall mortality                                  | 39 (1.1%)                   | 4 (2.1%)                     | 43 (1.2%)         | 0.281   |
| 1-year mortality                                   | 25 (0.7%)                   | 3 (1.6%)                     | 28 (0.7%)         | 0.174   |

SD, standard deviation; BMI, body mass index; DM, diabetes mellitus; HTN, hypertension; CVA, cerebrovascular accident; ASA, American Society of Anesthesiologists classification; MBP, mean blood pressure; ICU, intensive care unit; RBC, red blood cell. Values are expressed as the mean (SD), median (interquartile range), or n (proportion).
